# Supplementary material
Source: PubMed Central journal article supplement (PMC6599584)
Supplement: NIHMS1023951-supplement.pdf [file NIHMS1023951-supplement.pdf]

## Supplementary Online Content

Kharbanda EO, Vazquez-Benitez G, Lipkind HS, et al. Evaluation of the association of maternal pertussis vaccination with obstetric events and birth outcomes. *JAMA*. doi:10.1001/jama.2014.14825.

**eTable 1.** Clinical characteristics of women with a chorioamnionitis ICD-9 code from 2 Vaccine Safety Datalink sites, 2010-2012, chart review data

This supplementary material has been provided by the authors to give readers additional information about their work.

**eTable 1.** Clinical characteristics of women with a chorioamnionitis *ICD-9* code from 2 Vaccine Safety Datalink sites, 2010-2012, chart review data

|                                                                    | <b>Chorioamnionitis <i>ICD-9</i> code<br/>(658.41)<br/>N=220</b> |
|--------------------------------------------------------------------|------------------------------------------------------------------|
|                                                                    | No. (%)                                                          |
| <b>Clinical diagnosis of chorioamnionitis</b>                      | 213 (96.8)                                                       |
| <b>Fever <math>\geq 100.4</math> F</b>                             | 179 (81.4)                                                       |
| <b>Uterine or fundal tenderness</b>                                | 6 (2.8)                                                          |
| <b>Maternal tachycardia</b><br>(heart rate > 100 beats per minute) | 170 (77.3)                                                       |
| <b>Fetal tachycardia</b><br>(heart rate > 160 beats per minute)    | 128 (58.2)                                                       |
| <b>Malodorous vaginal fluid</b>                                    | 7 (3.2)                                                          |
| <b>Pus-like vaginal fluid</b>                                      | 7 (3.2)                                                          |
| <b>In labor prior to delivery</b>                                  | 208 (94.6)                                                       |
| <b>Prolonged labor</b><br>(Labor lasting >36 hours)                | 2 (0.9)                                                          |
| <b>Epidural</b>                                                    | 209 (95)                                                         |
| <b>Preterm birth</b><br>(birth < 37 weeks gestation)               | 14 (6.4)                                                         |
| <b>Group B strep positive</b>                                      | 49 (22.3)                                                        |
| <b>Received antibiotics</b>                                        | 200 (90.9)                                                       |
| <b>Placental pathology</b>                                         |                                                                  |
| Chorioamnionitis                                                   | 43 (19.6)                                                        |
| Funisitis                                                          | 16 (7.3)                                                         |
| Normal                                                             | 5 (2.3)                                                          |
| Not performed                                                      | 159 (72.3)                                                       |
